# Supplementary material for: Comprehensive analysis of circular RNA profiles in skeletal muscles of aging mice and after aerobic exercise intervention
Source: publisher site journal article supplement (doi:10.18632/aging.102932), 2020-03-17
Supplement: Supplementary file [file aging-v12i6-102932-supplementary-material-SD1.pdf]

## SUPPLEMENTARY FIGURES

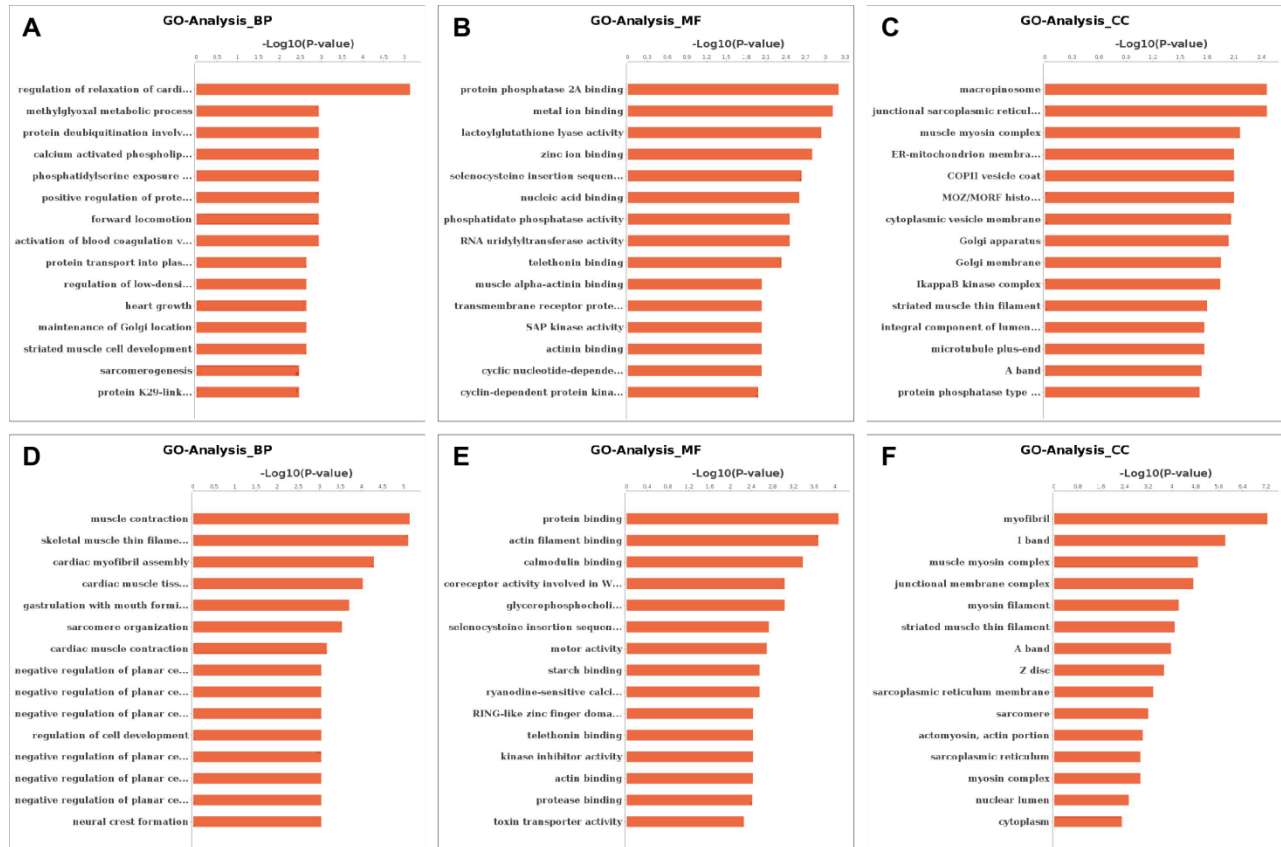

**Supplementary Figure 1. GO analysis of host genes of upregulated circRNAs with top 10 enrichment score.** GO analysis between aging and young group. (A–C) or Exercising and Aging group (D–F). The horizontal axis is the enrichment score for the GO terms, and the vertical axis is the GO terms. The enrichment score was calculated as  $-\log_{10}(P\text{-value})$ .

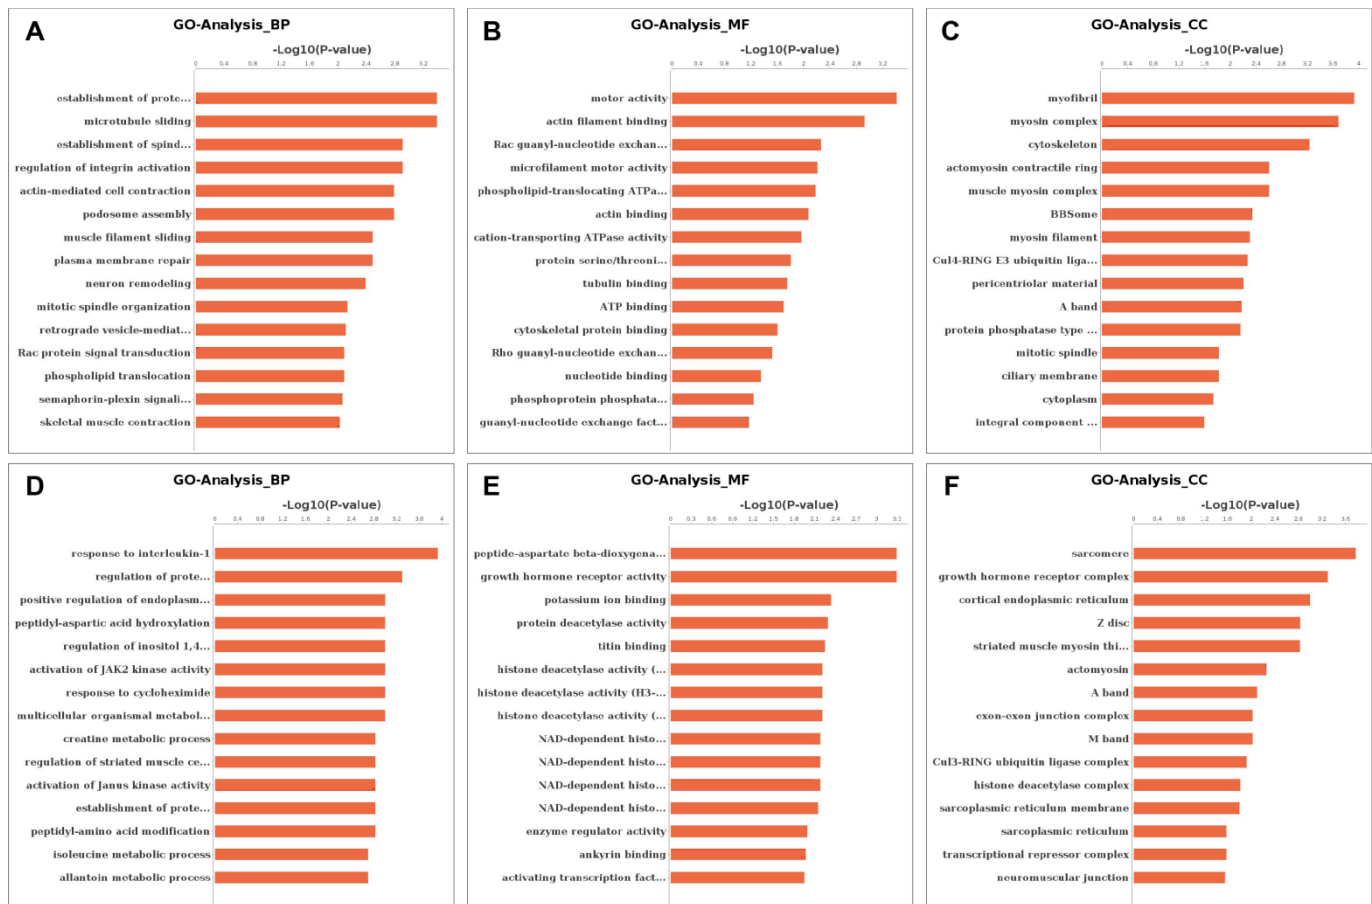

**Supplementary Figure 2. GO analysis of host genes of down-regulated circRNAs with top 10 enrichment score.** GO analysis between aging and young group. (A–C) or Exercising and Aging group (D–F). The horizontal axis is the enrichment score for the GO terms, and the vertical axis is the GO terms. The enrichment score was calculated as  $-\log_{10}(P\text{-value})$ .

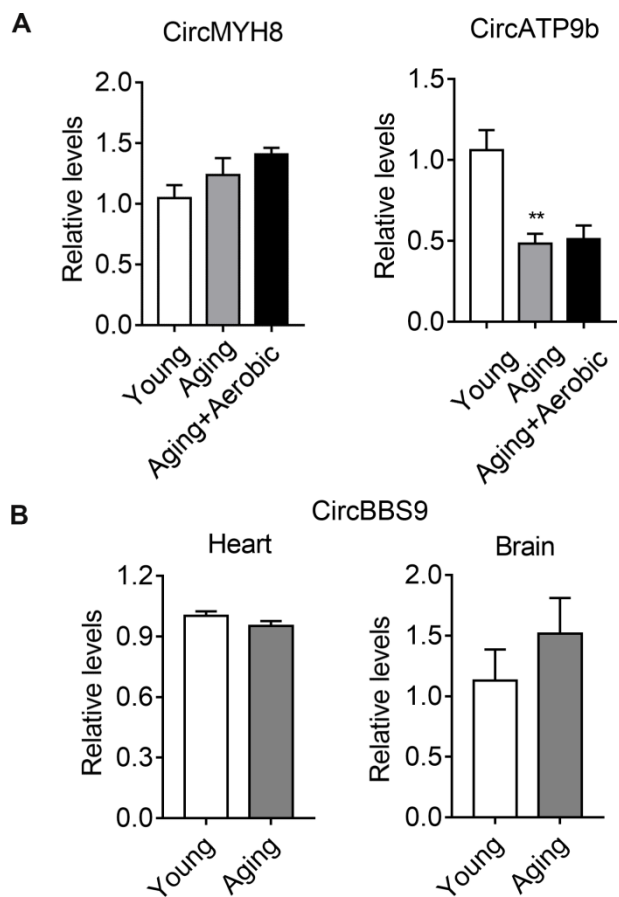

**Supplementary Figure 3. Expression levels of circMYH8 and circATP9b in Qu muscle, as well as circBBS9 levels in heart and brain.** (A) Expression levels of circMYH8 and circATP9b in Qu muscle among groups of young, aging and aging with aerobic exercise (n=6 per group). (B) Expression levels of circBBS9 in heart and brain of young and aging mice (n=6 per group). Data are presented as mean  $\pm$  SEM and \*\*P<0.01.
